# Supplementary material
Source: PubMed Central journal article supplement (PMC2768428)
Supplement: NIHMS95960-supplement-supplement_1.pdf [file NIHMS95960-supplement-supplement_1.pdf]

MnTBAP. The results shown are representative of at least 3 independent experiments performed in duplicate. Error bars indicate s.e.m. \* denotes  $P < 0.05$  versus  $\beta$ Gal alone and † denotes  $P < 0.05$  versus ANT1 alone.

**SUPPLEMENTARY FIGURE 1. Bongkreikic acid attenuates ANT1-induced cell death and ROS production.** *A*, Propidium iodide (PI) staining in Ad $\beta$ Gal and AdANT1-infected neonatal cardiomyocytes treated with either vehicle or 25  $\mu$ M bongkreikic acid (BKA). *B*, TUNEL staining in Ad $\beta$ Gal and AdANT1-infected cardiomyocytes treated with either vehicle or BKA. *C*, ROS production, as determined by DCF fluorescence, in Ad $\beta$ Gal or AdANT1-infected cardiomyocytes treated with either vehicle or BKA. The results shown are representative of 3 independent experiments performed in duplicate. Error bars indicate s.e.m, and \* denotes  $P < 0.05$  versus  $\beta$ Gal alone and † denotes  $P < 0.05$  versus ANT1 alone.

**SUPPLEMENTARY FIGURE 2. Overexpression of the inner mitochondrial membrane proteins mitofilin and citrin does not induce cardiomyocyte death.** *A*, Western blotting for mitofilin in neonatal cardiomyocytes infected with  $\beta$ Gal- or mitofilin (MiF)-expressing adenoviruses. VDAC was used as a loading control. *B*, Western blotting for citrin in cardiomyocytes infected with  $\beta$ Gal- or citrin-FLAG-expressing adenoviruses. Actin was used as a loading control. *C*, Propidium iodide (PI) staining in Ad $\beta$ Gal, AdMiF, AdCitrin, and AdANT1-infected cardiomyocytes. All results represent the average values of 3 independent experiments performed in duplicate. Error bars indicate s.e.m, and \* denotes  $P < 0.05$  versus  $\beta$ Gal.
